# Supplementary material for: Interfacial charge modulation: carbon quantum dot implanted carbon nitride double-deck nanoframes for robust visible-light photocatalytic tetracycline degradation
Source: Royal Society of Chemistry journal article supplement (doi:10.1039/c9nr09945j), 2019-12-27
Supplement: c9nr09945j1.pdf [file c9nr09945j1.pdf]

## Supporting Information

### Interfacial Charge Modulation: Carbon Quantum Dot Implanted Carbon Nitride Double-Deck Nanoframes for Robust Visible-Light Photocatalytic Tetracycline Degradation

Yuan-Yuan Li<sup>1</sup>, Yuan Si<sup>1</sup>, Bing-Xin Zhou<sup>1</sup>, Tao Huang<sup>1</sup>, Wei-Qing Huang<sup>1, #</sup>, Wangyu Hu<sup>2</sup>, Anlian Pan<sup>2</sup>, Xiaoxing Fan<sup>3</sup>, Gui-Fang Huang<sup>1, \*</sup>

1. Department of Applied Physics, School of Physics and Electronics, Hunan University, Changsha 410082, China

2 School of Materials Science and Engineering, Hunan University, Changsha 410082, China

3. School of Physics, Liaoning University, Shenyang, 110036. P. R. China

### Experimental Section

All the chemicals were analytical grade reagents and used directly without any further purification.

Synthesis of pure CN: pure CN was prepared by a thermal polymerization method. Typically, 1 g melamine was placed into a 50 mL ceramic crucible with a cover. Then the crucible was heated to 550 °C at a heating rate of about 5 °C min<sup>-1</sup> for 4 h in a muffle furnace. Finally, the crucible was cooled naturally to room temperature and CN powders with canary yellow color were obtained.

Synthesis of CQDs: The CQDs were synthesized according to our previous work.<sup>1</sup> Citric acid (2.625 g) and ethylenediamine (837 μL) were dissolved in deionized water (25 mL). Then, the solution was transferred to a 50 mL Teflon-lined autoclave and heated at 180 °C for 5 h. After the reaction, the reactor was cooled down to room temperature by water or naturally. The product, which was brown-black and transparent, was subjected to dialysis to afford CQDs

Formation of CM-CQDs and CM Complexes: The CM complexes were prepared by mixing 1g melamine, 1g cyanuric acid and a certain amount of carbon quantum dots (CQDs) (0.039g/mL) in 80 mL of DI water in a beaker under an oil bath at 125 °C for 4h. Finally, the beaker was cooled naturally to room temperature and white CM-CQDs powders were obtained. The CM-CQDs complexes formed by using melamine and cyanuric acid with different contents of CQDs (20, 40, 100 and 500 μl) were labelled as CM-CQDs-20, CM-CQDs-40, CM-CQDs-100 and CM-CQDs-500 respectively. The CM was obtained by the same method without the CQDs addition.

---

#\*.Corresponding author. *E-mail address*: wqhuang@hnu.edu.cn

\*.Corresponding author. *E-mail address*: gfh Huang@hnu.edu.cn

Synthesis of CN-CQDs and CNs: A very similar procedure to CN was conducted to synthesize CN-CQDs. The only difference was that CM-CQDs powders were used as precursor for thermal polymerization. The CN-CQDs derived from CM-CQDs-20, CM-CQDs-40, CM-CQDs-100 and CM-CQDs-500 were denoted as CN-CQDs-20, CN-CQDs-40, CN-CQDs-100 and CN-CQDs-500 respectively. The product obtained by calcination CM was denoted as CNs.

Characterizations: The morphologies of samples were acquired by the field-emission scanning electron microscopy (SEM) (Hitachi S-4800). Transmission electron microscopy (TEM) images were characterized by the Hitachi H600 with 200 kV acceleration voltage. Powder X-ray diffraction (XRD) analysis were conducted on a PANalytical X'pert diffractometer operated at 40 kV and 40 mA using Cu K $\alpha$  radiation. X-ray photoelectron spectroscopy (XPS) was performed by using a Thermo Scientific Escalab 250Xi spectrometer and Fourier transform infrared (FTIR) spectra were carried out a Thermo Nicolet 6700 spectrometer. UV-vis spectroscopy was recorded on a Shimadzu UV-2600 spectrophotometer. Nitrogen adsorption/desorption measurement was measured on -196 °C using a Micromeritics instrument (3Flex Version 3.01). Classic relative pressure range ( $P/P_0 = 0.05-0.20$ ) was performed to determine the specific BET surface area. Photoluminescence (PL) spectra were tested by a Hitachi F-7000 fluorescence spectrometer.

Photoelectrochemical measurement: The photoelectrochemical measurements were carried out by using a standard three-electrode system on a CHI660E electrochemical station in 0.5 M Na<sub>2</sub>SO<sub>4</sub> used as the electrolyte. The working electrode consisted of 5 mg photocatalysts, which are loaded on the surface of FTO glass (1 cm  $\times$  2 cm) evenly. An Ag/AgCl and a Pt plate were employed as the reference and counter electrode, respectively. In this experiment, a 40 W LED lamp was used as the visible-light source. The applied potential was converted into the RHE scale by using the Nernst equation;  $E_{RHE} = E_{Ag/AgCl} + 0.059 \times PH + 0.197$ . The Mott-Schottky plots were performed by an AC voltage magnitude of 7 mV with the frequency of 1000, 1500 and 2000Hz. Electrochemical impedance spectroscopy (EIS) was recorded in the presence of 5 mM [Fe(CN)<sub>6</sub>]<sup>3-</sup>/[Fe(CN)<sub>6</sub>]<sup>4-</sup> at in the frequency range of 0.01 Hz and 1000 kHz. The photocurrent response of the photocatalysts as light on and off was performed without bias voltage.

The photocatalytic activity was assessed by the degradation of tetracycline (TC) or rhodamine (RhB) under a 40 W LED lamp as visible-light source. In a representative photocatalytic degradation

experiment, TC (40 mL, 40 mgL<sup>-1</sup>) or RhB (40 mL, 10 mgL<sup>-1</sup>) with samples (20 mg or 10 mg) were mixed in a glass bottle in the dark with continuous ultrasound for 30 min at room temperature to reach the adsorption-desorption equilibrium between the solvent and sample. During the photoreaction process, 3 mL mixture was gathered in the 0.5 or 1 h intervals. Centrifugal supernatant liquor was measured by a Shimadzu UV-2450 spectrophotometer to log the maximum absorbance at 360 nm for TC and 554 nm for RhB. The degradation ratio (k) of TC or RhB over samples is calculated:

$$k=(1-C_t/C_0) \times 100\%=(1-A_t/A_0) \times 100\% \quad (1)$$

Where  $C_0$  is the primeval concentration of organic pollutants,  $C_t$  is the concentration after degrading.  $A_0$  and  $A_t$  are the relevant absorbance value.

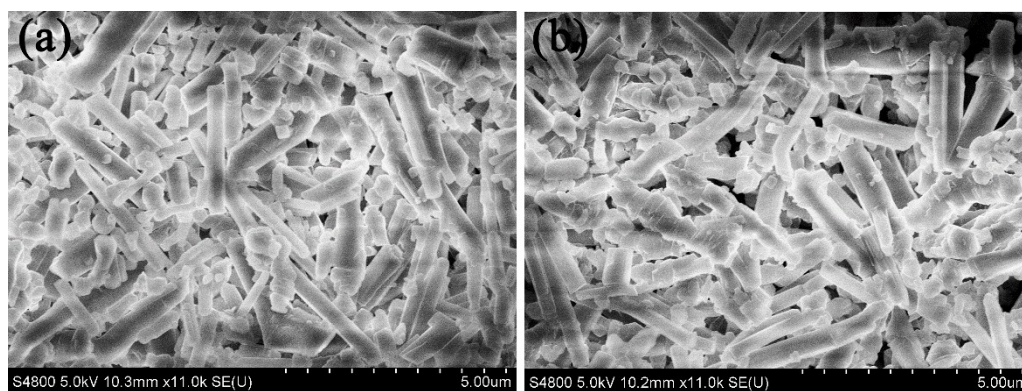

**Figure S1.** SEM images of a) CM and b) CM-CQDs-40.

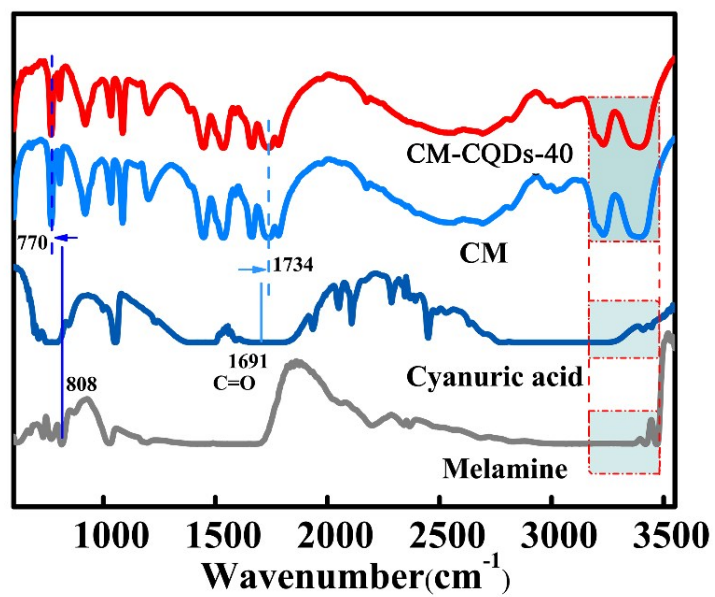

**Figure S2.** FTIR spectra of CM, CM-CQDs-40, cyanuric acid, and melamine.

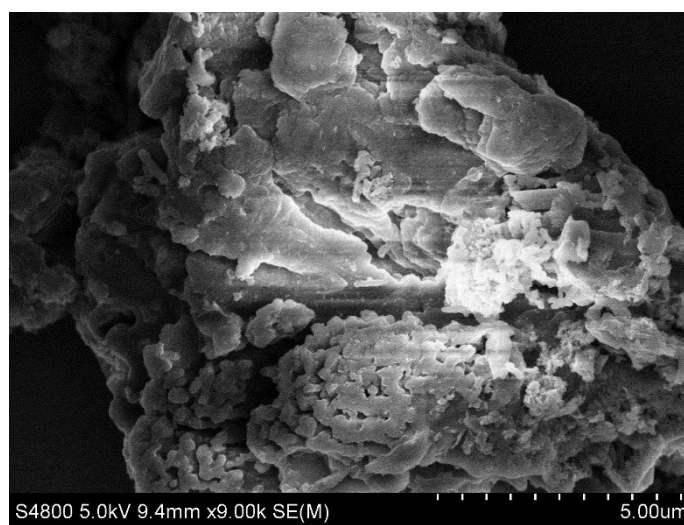

**Figure S3.** SEM images of pure CN.

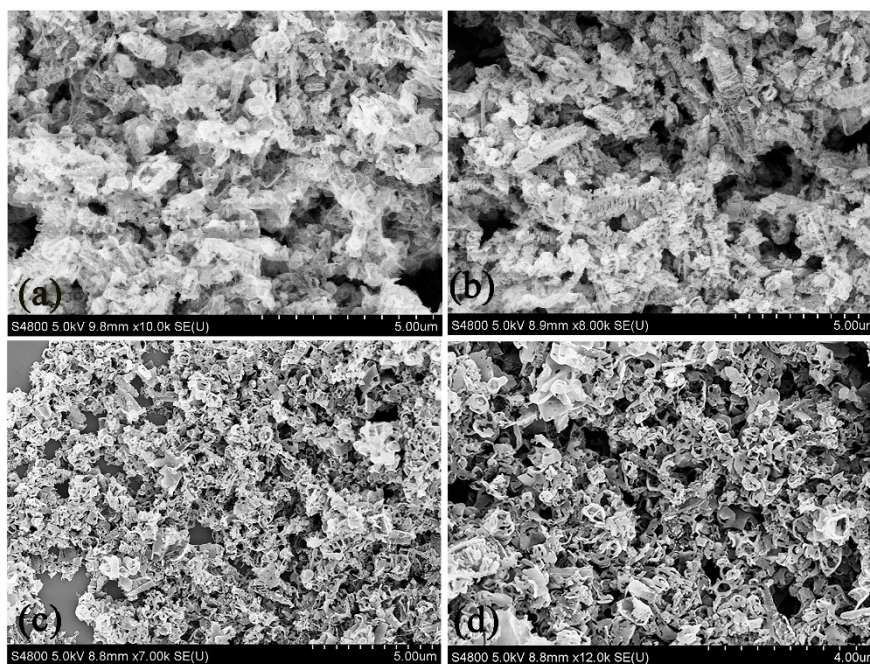

**Figure S4.** SEM images of a) CN-CQDs-20, b) CN-CQDs-100 and c, d) CN-CQDs-500.

**Table S1.** Summarized XPS data for CNs and CN-CQDs-40 surface C, N and O atom ratios determined from quantitative analyses are provided.

| XPS        |       |       |      |
|------------|-------|-------|------|
| samples    | C     | N     | O    |
| CNs        | 45.7% | 49.8% | 4.5% |
| CN-CQDs-40 | 61.1% | 30.2% | 8.7% |

**Table S2.** Summarized XPS data for CNs and CN-CQDs-40 surface C/N atom ratios determined from quantitative analyses are provided.

| XPS        |      |
|------------|------|
| samples    | C/N  |
| CN         | 0.92 |
| CN-CQDs-40 | 2.02 |

**Table S3.** Band positions of CNs, CN-CQDs-20, CN-CQDs-40 and CN-CQDs-100. All the values in tables are referenced to the electrochemical scale of the reversible hydrogen electrode.

| Product     | CB, eV (NHE ) | VB, eV(NHE ) | E <sub>g</sub> , eV |
|-------------|---------------|--------------|---------------------|
| CNs         | -0.49         | 2.28         | 2.77                |
| CN-CQDs-20  | -0.41         | 2.33         | 2.74                |
| CN-CQDs-40  | -0.38         | 2.35         | 2.73                |
| CN-CQDs-100 | -0.34         | 2.37         | 2.71                |

**Table S4.** Comparison of TC photodegradation efficiency of CN-CQDs-40 photocatalyst with another CN-based photocatalysts under visible light irradiation.

| Photocatalyst                                            | Photocatalyst dosage [g/L] | Light source         | Concentration [mg/L] | Photodegradation Removal efficiency | Photodegradation efficiency (h <sup>-1</sup> ) | Ref.      |
|----------------------------------------------------------|----------------------------|----------------------|----------------------|-------------------------------------|------------------------------------------------|-----------|
| CN-CQDs-40                                               | 0.5                        | 40W LED lamp         | 40                   | 60min, 74%                          | 1.2                                            | This work |
| B-CN                                                     | 0.5                        | Xe lamp              | 10                   | 180min, 98%                         | 1.37                                           | 2         |
| $\alpha$ -Fe <sub>2</sub> O <sub>3</sub> -CN             | 0.4                        | 500w Xe lamp         | 20                   | -                                   | 1.2                                            | 3         |
| GO/CN/BiOI                                               | 0.3                        | LED lamp             | 30                   | 100min, 74%                         | -                                              | 4         |
| S doped CQDs-CN                                          | 1                          | 300W Xe lamp         | 20                   | 60min, 83%                          | 1.75                                           | 5         |
| CN/Ag/P3HT                                               | 1                          | 100W LED lamp        | 20                   | -                                   | 0.3168                                         | 6         |
| Cl-CN                                                    | 0.5                        | 300W Xe lamp         | 10                   | 120min, 92%                         | 1.2                                            | 7         |
| BiOI/CN/CeO <sub>2</sub>                                 | -                          | 300W Xe lamp         | 20                   | 120min, 92%                         | 1.2                                            | 8         |
| ZnIn <sub>2</sub> S <sub>4</sub> /CN                     | 0.4                        | 500W Xe lamp         | 50                   | 120min, 85%                         | 0.6                                            | 9         |
| Fe-CN-graphite                                           | 0.5                        | 300W Xe lamp         | 20                   | 120 min, 99%                        | -                                              | 10        |
| carbon nanotube-CN                                       | 0.5                        | 300W Xe lamp         | 20                   | -                                   | 2.88                                           | 11        |
| carbon plane/CN/TiO <sub>2</sub>                         | 1.0                        | 500 W Xe lamp        | 10                   | 180min, 94%                         | 1.8                                            | 12        |
| CQDs/CN                                                  | 0.5                        | 250W Xe lamp         | 10                   | 240min, 80%                         | 0.3852                                         | 13        |
| Ag/Fe <sub>3</sub> O <sub>4</sub> /CN                    | 0.5                        | 300W Xe lamp         | 20                   | 90min, 98%                          | 1.308                                          | 14        |
| RGO/CdIn <sub>2</sub> S <sub>4</sub> /CN                 | 1.0                        | 500 W Xe lamp        | 10                   | 180 min, 74%                        | 0.462                                          | 15        |
| WO <sub>3</sub> /CN/Bi <sub>2</sub> O <sub>3</sub>       | 1.0                        | 300W Xe lamp         | 10                   | 60 min, 80%                         | 1.422                                          | 16        |
| Acid modified CN                                         | 0.5                        | 300W Xe lamp         | 40                   | 60min, 86%                          | 1.944                                          | 17        |
| Ag/Bi <sub>5</sub> FeTi <sub>3</sub> O <sub>15</sub> /CN | 0.5                        | 300W Xe lamp         | 20                   | 40min, 90%                          | 2.79                                           | 18        |
| CN/CdS                                                   | 0.5                        | 35W Xe lamp sunlight | 50                   | 60min, 80%                          | 1.17                                           | 19        |



**Table S5.** Comparison of RhB photodegradation efficiency of CN-CQDs-40 photocatalyst with another CN-based photocatalysts under visible light irradiation.

| Photocatalyst                                        | Photocatalyst dosage(mg) | Light source         | Initial concentration (mg/L) | Photodegradation efficiency ( $\text{h}^{-1} 10 \text{ mg}^{-1}$ ) | Ref.      |
|------------------------------------------------------|--------------------------|----------------------|------------------------------|--------------------------------------------------------------------|-----------|
| CN-CQDs-40                                           | 10                       | 40W LED lamp         | 10                           | 2.04                                                               | This work |
| Red P-CN                                             | 40                       | 300W Xe lamp         | 10                           | 0.78                                                               | 20        |
| MIL-88A-CN                                           | 100                      | 1000W iodine lamp    | 10                           | 0.96                                                               | 21        |
| CN nanosheets                                        | 100                      | 300W Xe lamp         | 10                           | 0.31                                                               | 22        |
| B/P-CN                                               | 100                      | 300W Xe lamp         | 10                           | 0.19                                                               | 23        |
| CdS-CN                                               | 30                       | 300W Xe lamp         | 7                            | 1.67                                                               | 24        |
| SnO <sub>2</sub> -CN                                 | 100                      | visible light source | 50                           | 0.27                                                               | 25        |
| Oxalic acid/N-GQD-CN                                 | 50                       | 500W Xe lamp         | 15                           | 2.05                                                               | 26        |
| N-deficient CN                                       | 50                       | 150W Xe lamp         | 5                            | 0.59                                                               | 27        |
| Ni-Mn-LDH-CN                                         | 100                      | Hg lamp              | 50                           | 0.18                                                               | 28        |
| WO <sub>3</sub> -CN                                  | 100                      | XG500 Xe lamp        | 10                           | 0.09                                                               | 29        |
| BiOCl-CN                                             | 30                       | 300W Xe lamp         | 10                           | 0.82                                                               | 30        |
| Flake-like CN                                        | 100                      | 300W Xe lamp         | 10                           | 0.13                                                               | 31        |
| P doped CN                                           | 50                       | 250W sodium lamp     | 10                           | 0.08                                                               | 32        |
| Na-CN                                                | 50                       | 250 W sodium lamp    | 10                           | 0.08                                                               | 33        |
| Ka-CN                                                | 50                       | 250 W sodium lamp    | 10                           | 0.13                                                               | 34        |
| Ka-Na/CN                                             | 50                       | 250 W sodium lamp    | 10                           | 0.20                                                               | 35        |
| [WO <sub>4</sub> ] <sup>2-</sup> /CN                 | 100                      | 300W Halogen lamp    | 10                           | 0.13                                                               | 36        |
| YVO <sub>4</sub> /CN                                 | 100                      | 350W Xe lamp         | 10                           | 0.23                                                               | 37        |
| TiO <sub>2</sub> /In <sub>2</sub> O <sub>3</sub> /CN | 80                       | 300W Xe lamp         | 10                           | 0.35                                                               | 38        |

## References

1. Y. Wang, X. Liu, J. Liu, B. Han, X. Hu, F. Yang, Z. Xu, Y. Li, S. Jia, Z. Li and Y. Zhao, *Angew. Chem. Int. Edit.*, 2018, **57**, 5765-5771.
2. B. Song, Q. Wang, L. Wang, J. Lin, X. Wei, V. Murugadoss, S. Wu, Z. Guo, T. Ding and S. Wei, *J. Colloid Interface Sci.*, 2020, **559**, 124-133.
3. S. Wang, Z. Teng, Y. Xu, M. Yuan, Y. Zhong, S. Liu, C. Wang, G. Wang and T. Ohno, *Appl. Catal. B: Environ.*, 2020, **260**, 118145.
4. Q. Wang, Y. Li, L. Huang, F. Zhang, H. Wang, C. Wang, Y. Zhang, M. Xie and H. Li, *Appl. Surf. Sci.*, 2019, **497**, 143753.
5. W. Wang, Z. Zeng, G. Zeng, C. Zhang, R. Xiao, C. Zhou, W. Xiong, Y. Yang, L. Lei, Y. Liu, D. Huang, M. Cheng, Y. Yang, Y. Fu, H. Luo and Y. Zhou, *Chem. Eng. J.*, 2019, **378**, 122132.
6. F. Liu, N. Thien-Phap, Q. Wang, F. Massuyeau, Y. Dan and L. Jiang, *Appl. Surf. Sci.*, 2019, **496**, 143653.
7. F. Guo, M. Li, H. Ren, X. Huang, K. Shu, W. Shi and C. Lu, *Sep. Purif. Technol.*, 2019, **228**, 115770.
8. M. Yousefi, S. Villar-Rodil, J. I. Paredes and A. Z. Moshfegh, *J. Alloys Compd.*, 2019, **809**, 151783.
9. H. Yang, R. Cao, P. Sun, J. Yin, S. Zhang and X. Xu, *Appl. Catal. B: Environ.*, 2019, **256**, 117862.
10. X. Wang, Y. Xie, J. Ma and P. Ning, *RSC Adv.*, 2019, **9**, 34658-34670.
11. H. Zhao, S. Wang, F. He, J. Zhang, L. Chen, P. Dong, Z. Tai, Y. Wang, H. Gao and C. Zhao, *Carbon*, 2019, **150**, 340-348.
12. C. Liu, S. Dong and Y. Chen, *Chem. Eng. J.*, 2019, **371**, 706-718.
13. Y. Hong, Y. Meng, G. Zhang, B. Yin, Y. Zhao, W. Shi and C. Li, *Sep. Purif. Technol.*, 2016, **171**, 229-237.
14. Z. Zhu, Z. Lu, D. Wang, X. Tang, Y. Yan, W. Shi, Y. Wang, N. Gao, X. Yao and H. Dong, *Appl. Catal. B: Environ.*, 2016, **182**, 115-122.
15. P. Xiao, D. Jiang, L. Ju, J. Jing and M. Chen, *Appl. Surf. Sci.*, 2018, **433**, 388-397.
16. L. Jiang, X. Yuan, G. Zeng, J. Liang, X. Chen, H. Yu, H. Wang, Z. Wu, J. Zhang and T. Xiong, *Appl. Catal. B: Environ.*, 2018, **227**, 376-385.
17. F. He, S. Wang, H. Zhao, Y. Wang, J. Zhang, Q. Yan, P. Dong, Z. Tai, L. Chen, Y. Wang and C. Zhao, *Appl. Surf. Sci.*, 2019, **485**, 70-80.
18. K. Wang, J. Li and G. Zhang, *ACS Appl. Mater. Interfaces*, 2019, **11**, 27686-27696.
19. L. Guomin, W. Bing, Z. Jian, W. Rui and L. Huiling, *Appl. Surf. Sci.*, 2019, **478**, 1056-1064.
20. J. Li, C. Tian, H. Zhao, J. Mei, J. Zhang and S. Yang, *J. Alloys Compd.*, 2019, **810**, 151885.
21. Z. Shao, D. Zhang, H. Li, C. Su, X. Pu and Y. Geng, *Sep. Purif. Technol.*, 2019, **220**, 16-24.
22. S. Sun, E. Fan, H. Xu, W. Cao, G. Shao, B. Fan, H. Wang and R. Zhang, *Nanotechnology*, 2019, **30**, 315601.
23. H. Zhang, X. Han, H. Yu, Y. Zou and X. Dong, *Sep. Purif. Technol.*, 2019, **226**, 128-137.
24. X. Li, M. Edelmannova, P. Huo and K. Koci, *J. Mater. Sci.*, 2020, **55**, 3299-3313.
25. M. U. Yousaf, E. Pervaiz, S. Minallah, M. J. Afzal, H. Liu and M. Yang, *Results Phys.*, 2019, **14**, 102455.

26. Y. Sun, C. Wang, G. Gu, Y. Ma, Z. Xiong and Y. Liu, *Catal. Today*, 2020, **340**, 294-301.
27. S. Zhang, C. Hu, H. Ji, L. Zhang and F. Li, *Appl. Surf. Sci.*, 2019, **478**, 304-312.
28. M. Shakeel, M. Arif, G. Yasin, B. Li and H. D. Khan, *Appl. Catal. B: Environ.*, 2019, **242**, 485-498.
29. J. Chen, X. Xio, Y. Wang and Z. Ye, *Appl. Surf. Sci.*, 2019, **467**, 1000-1010.
30. X. Zhang, D. An, D. Feng, F. Liang, Z. Chen, W. Liu, Z. Yang and M. Xian, *Appl. Surf. Sci.*, 2019, **476**, 706-715.
31. J. Yan, X. Han, X. Zheng, J. Qian, J. Liu, X. Dong and F. Xi, *Mater. Res. Bull.*, 2017, **94**, 423-427.
32. S. Hu, L. Ma, J. You, F. Li, Z. Fan, G. Lu, D. Liu and J. Gui, *Appl. Surf. Sci.*, 2014, **311**, 164-171.
33. J. Zhang, S. Hu and Y. Wang, *RSC Adv.*, 2014, **4**, 62912-62919.
34. S. Hu, F. Li, Z. Fan, F. Wang, Y. Zhao and Z. Lv, *Dalton Trans.*, 2015, **44**, 1084-1092.
35. J. Zhao, L. Ma, H. Wang, Y. Zhao, J. Zhang and S. Hu, *Appl. Surf. Sci.*, 2015, **332**, 625-630.
36. J. Ding, L. Wang, Q. Liu, Y. Chai, X. Liu and W.-L. Dai, *Appl. Catal. B: Environ.*, 2015, **176**, 91-98.
37. J. Cai, Y. He, X. Wang, L. Zhang, L. Dong, H. Lin, L. Zhao, X. Yi, W. Weng and H. Wan, *RSC Adv.*, 2013, **3**, 20862-20868.
38. Z. Jiang, D. Jiang, Z. Yan, D. Liu, K. Qian and J. Xie, *Appl. Catal. B: Environ.*, 2015, **170**, 195-205.
